# Supplementary material
Source: publisher figshare collection journal article supplement (https://karger.figshare.com/ndownloader/files/22645169)
Supplement: Supplementary file 1 [file 22645169]

**Supplementary Material**

**Supplementary Table S1**

Correlations between lung function, respiratory muscle strength and diaphragm ultrasound parameters

|  | FVC (L) | MIP (cmH2O) | MEP (cmH2O) | Pdi MM (cmH2O) | Pes MM (cmH2O) | Pdi SM  (cmH2O) | Pes SM (cmH2O) |
| --- | --- | --- | --- | --- | --- | --- | --- |
| Amplitude during tidal breathing (cm) | - | - | - | - | - | - | - |
| Velocity during tidal breathing (cm/sec) | - | - | - | - | - | - | - |
| Amplitude during voluntary sniff (cm) | - | - | - | - | - | - | - |
| Velocity during voluntary sniff (cm/sec) | 0.43 | 0.36 | 0.34 | 0.36 | - | 0.39 | -0.34 |
| Amplitude during maximal inspiration (cm) | 0.63 | 0.44 | 0.47 | 0.33 | -0.34 | **-** | **-** |
| Thickness at FRC (cm) | **-** | **-** | **-** | **-** | **-** | **-** | **-** |
| Thickness at TLC (cm) | **-** | 0.30 | - | **-** | **-** | **-** | **-** |
| Diaphragm thickening ratio | - | - | - | - | - | - | - |

Values are expressed as Pearson’s correlation coefficient (r). FVC, forced vital capacity; MEP, maximum inspiratory pressure; MIP, maximum expiratory pressure; Pdi, transdiaphragmatic pressure; Pes, esophageal pressure; MM, Mueller maneuver; SM, sniff maneuver; FRC, functional residual capacity; TLC, total lung capacity.
